# Supplementary material for: A graphitic carbon nitride-based efficient nanocomposite: low cost and stupefying photocatalyst for the degradation of tetracycline and As3+ in wastewater
Source: Royal Society of Chemistry journal article supplement (doi:10.1039/d4ew00376d), 2024-01-01
Supplement: d4ew00376d1.pdf [file d4ew00376d1.pdf]

## Electronic supplementary information

### A graphitic carbon nitride-based efficient nanocomposite: low cost and stupefying photocatalyst for the degradation of tetracycline and As<sup>3+</sup> in wastewater

Kabir Hussain Badagoppam Haroon, Varsha UshaVipinachandran, Santanu Bera, Vijay Sithaiyan and Susanta Kumar Bhunia\*

Department of Chemistry, School of Advanced Sciences, Vellore Institute of Technology, Vellore, 632014, India

Corresponding author Email: [susanta.bhunias@vit.ac.in](mailto:susanta.bhunias@vit.ac.in) ; [susanta.chem@gmail.com](mailto:susanta.chem@gmail.com)

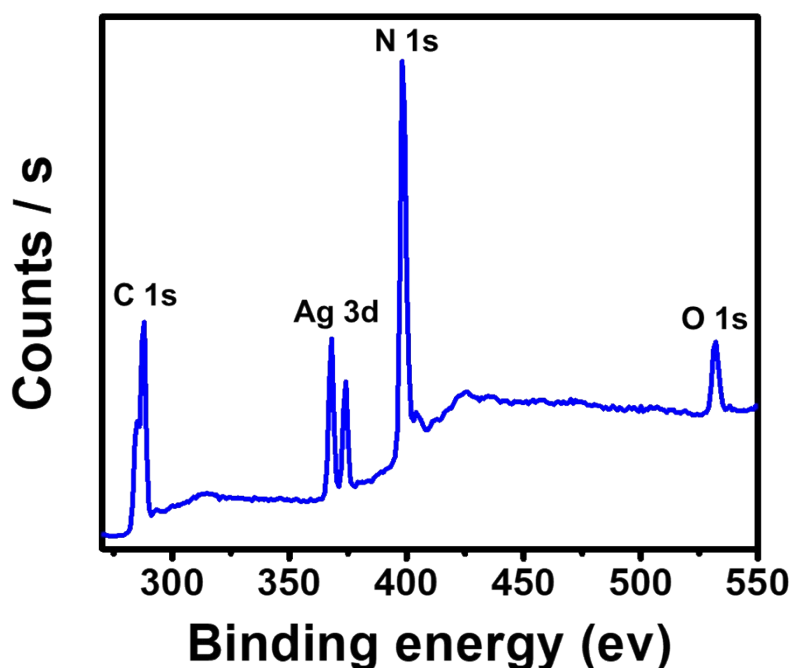

Fig. S1. XPS survey spectra of AgECN-3 % nanocomposite.

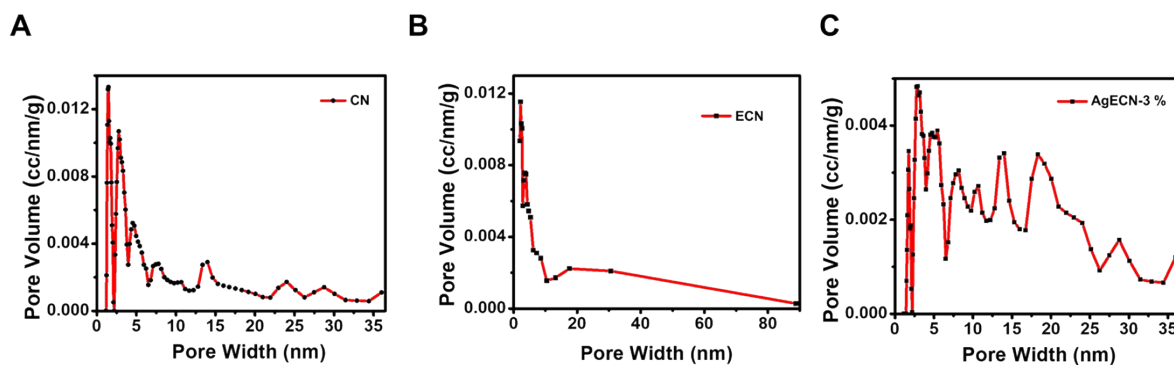

Fig. S2. Pore volume results of (A) CN, (B) ECN, and (C) AgECN-3 % nanocomposite.

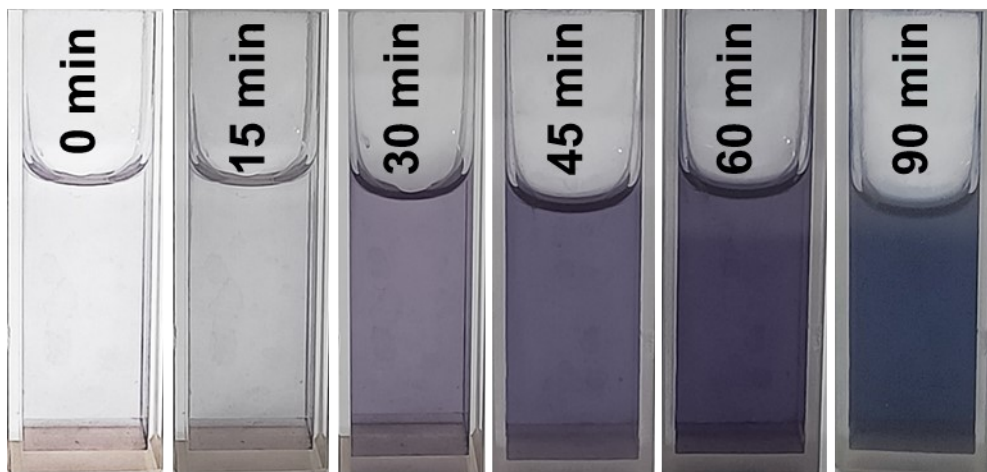

**Fig. S3.** Digital images representing the formation of purple color formazan at different time intervals.

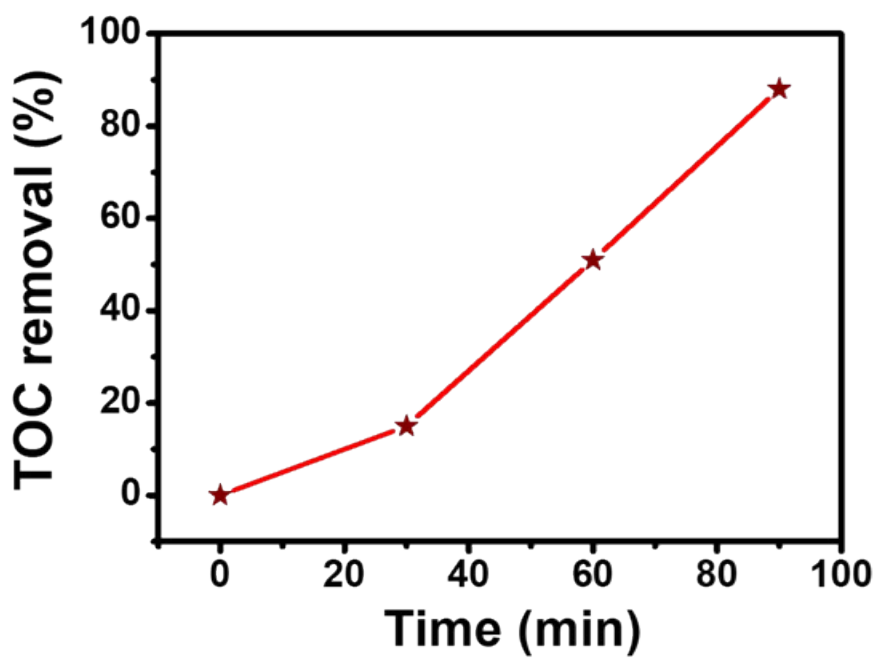

**Fig. S4.** TOC removal rate for the photocatalytic degradation of TC.

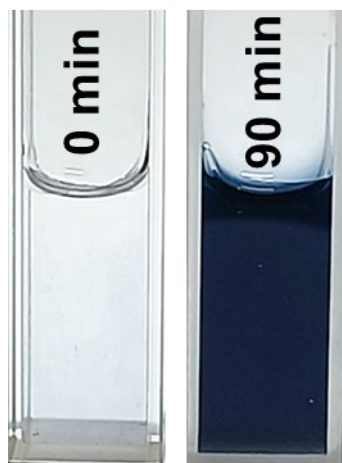

**Fig. S5.** Validation for  $\text{As}^{5+}$  formation by molybdenum blue method from photocatalytic oxidation of  $\text{As}^{3+}$ .
